# Supplementary material for: Predictive Computational Modeling of the Mucosal Immune Responses during Helicobacter pylori Infection
Source: PLoS One. 2013 Sep 5;8(9):e73365. doi: 10.1371/journal.pone.0073365 (PMC3764126; doi:10.1371/journal.pone.0073365)
Supplement: Table S1 — Calibration database to adjust parameters on the Helicobacter pylori computational deterministic model. Data for Th1, Th17, Treg, effector dendritic cells (eDCs), tolerogenic dendritic cells (tDCs), M1 and M2 macrophages is represented as either external inputs for the model or internal readings. The amount of HP (external input) will trigger different phenotype induction depending on the concentration. Consequently, different cell types in the gastric Lamina Propria (LPL) or in the gastric lymph nodes (GLN) will be upregulated or downregulated (internal readings). In the database, ‘TRT’ denotes a control versus an infected mouse, ‘Day’ corresponds to the day where measurements were taken and ‘HP_0′ is the inoculation dose of H. pylori. Furthermore, macroscopic scores for the GLN and gastric LP were annotated (Score_GLN and Score_LP) and leukocytic infiltration (LL), mucosal thickening (MT) and epithelial erosion (EE) was measured. Numbers are expressed as absolute cell numbers after exclusion of CD45- cells. A list of phenotypic markers for these populations can be found in Table S3. (XLSX) [file pone.0073365.s006.xlsx]

## Sheet: Sheet1
TRT	Day	HP_0	Score_GLN	Score_LP	LL	MT	EE	Th1_LP	Th17_LP	Treg_LP	eDC_LP	tDC_LP	MO_LP	M1_LP	M2_LP	Th1_GLN	Th17_GLN	Treg_GLN	eDC_GLN	tDC_GLN
CON	7	0	0	0	0	0	0										49800
CON	7	0	0	0	0	0	0										35900	87580
CON	7	0	0	0	0	0	0										25650	113729
CON	7	0	0	0	0	0	0										24500	99360
CON	14	0	0	0	0	0	0	1042760	55720	700480	413920	111440		3168080		202191			29526	59052
CON	14	0	0	0	0	0	0	750064	38464.8	455167	301308	166681	2.9682e+06	2.30148e+06	205146		42420
CON	14	0	0	0	0	0	0									105754		325710		78300
CON	14	0	0	0	0	0	0										21470	360684	42940
CON	14	0	0	0	0	0	0												16776	67104
CON	14	0	0	0	0	0	0			1498509			2668077	3.60008e+06	1.44369e+06	273630	58500	206640		81900
CON	14	0	0	0	0	0	0	589968	34704		682512	202440	2371440		219792	120938		391220	61992	75768
CON	30	0	0	0	0	0	0	385361									12030	553380	12030	48120
CON	30	0	0	0	0	0	0		207407	127635	430769	765811	5.96695e+06	3.23874e+06	255270	10500		191572	4672.5
CON	30	0	0	0	0	0	0	154321								20240	14146	226336		42438
CON	30	0	0	0	0	0	0										30440
CON	30	0	0	0	0	0	0										19830	575070	39660
CON	30	0	0	0	0	0	0									28710		223020		27197.5
CON	30	0	0	0	0	0	0	172032		526848	419328	268800	3354624	2225664	215040		45640
CON	30	0	0	0	0	0	0	342883	321453								19492		38984
CON	30	0	0	0	0	0	0	229272	262025	458543	360284	272942	4.64002e+06	1.65949e+06	141930			475750	17300	43250
CON	30	0	0	0	0	0	0									11235	28050	589050	14025	28050
CON	30	0	0	0	0	0	0									0	2250	90000
CON	30	0	0	0	0	0	0									28770	76209	1.7147e+06	38104.5	114314
CON	60	0	0	0	0	0	0		186552		5720928			2736096	4819260		128304		15552	54432
CON	60	0	0	0	0	0	0								3969628		45337.6	47194.4	26646.6
CON	60	0	0	0	0	0	0	448032		206784	4204608				3756576	45043.2	45043.2	34444.8	23846.4	60940.8
CON	60	0	0	0	0	0	0	422484	111180	111180	5514528			2156892		76507.2		78240	5094	39120
CON	60	0	0	0	0	0	0	467544						5.26766e+06	3.08579e+06	80040		60030	20010	36018
CON	60	0	0	0	0	0	0		241424	206935	5.48378e+06			1.86242e+06	2.13833e+06	77216.4	34318.4	38608.2		12869.4
CON	60	0	0	0	0	0	0									85285.2		73655.4	15506.4	46519.2
HP	7	50000000	0.5	1	0	0.5	0										6080	1195200
HP	7	50000000	1	1	0.5	0.5	0										3718	1245000
HP	7	50000000	1.5	2	0.5	0.5	0											1980000
HP	7	50000000	0.5	2													8120	381640
HP	7	50000000	0.5	2														1204800
HP	7	50000000	0.5	1.5													8352	1580250
HP	14	50000000	2	2	1	0.5	0		61746	568063		351952	2.60568e+06	1.09908e+06	228460			2073170	75680	302720
HP	14	50000000	2.5	2.5	1.5	0.5	0		58368	403712		145920	2305536		126464		18381	2232560	65300	391800
HP	14	50000000	2	2	1	0.5	0	1217907				278910	4313808				11869	3983300	27363	68407.5
HP	14	50000000	2	2	1	0.5	0			486513		308354	3.20688e+06	1.95976e+06	308354	91949	11132	1010955	14512.5	24187.5
HP	14	50000000	2	2	1	0.5	0										13104		14454	21681
HP	14	50000000	2.5	2.5	1	0.5	0									97911	17052.5		119368	187578
HP	14	50000000	2	2	1	0.5	0											1227780	26505	212040
HP	14	50000000	2	2	0.5	0.5	0									54000	15170	1404765	45510	106190
HP	14	50000000	2	2	1	0.5	0			421390	301891	132077	2.88055e+06	1.37738e+06	352206				127600	319000
HP	14	50000000	1.5	1.5	1	0.5	0		47968		425716	209860	2440372	1067288				1020800	128400	256800
HP	14	50000000	2	2	1.5	0.5	0	311832	43920			188856	1849032		228384			1797600	24300	97200
HP	14	50000000	2.5	2.5	0.5	0.5	0	196650		312075	444600	153900	1577475					1093500	44110	176440
HP	30	50000000	0	0.5	0.5	0.5	0		201863	1.39862e+06			6.07031e+06	2.58097e+06	821872	10500			10500	21000
HP	30	50000000	1	1	0.5	0.5	0	350856	214412		136444		8537496	3372116	448316	10700	40480		20240	60720
HP	30	50000000	1	0.5	0.5	0.5	0				183910		5648652	1642050		14400		949410	0	56175
HP	30	50000000	1	1	1	0.5	0			964232	349534		4.61626e+06	3.55561e+06			28710		0	10100
HP	30	50000000	1.5	0.5	0.5	0.5	0											947430	23415	46830
HP	30	50000000	2	0.5	0.5	0.5	0									14800	21400	772695	42800	107000
HP	30	50000000	0.5	1	0.5	0.5	0		309072	1751408		1377946	6477634			23415		831810	3093.5	12374
HP	30	50000000	2	1.5	1	0.5	0			1503108		1048680	3845160	2272140		21400	28770		5100	12750
HP	30	50000000	1	1	0.5	0.5	0	307230	279300	1759590		1019445	6395970		796005	24700	44000	96900	4510	27060
HP	30	50000000	1	1	0.5	0.5	0	538512	296182	915470	457735		5.60052e+06	3.17722e+06					4890	14670
HP	60	50000000			1	0.5	0				6025344				2185664				11854.8	26673.3
HP	60	50000000			1.5	0.5	0				4139460				1341756	334043	237346	184603	307671	509855
HP	60	50000000			1.5	0.5	0		96408		3117192				1221168		243459		6858	17145
HP	60	50000000			1	0.5	0	1979964		1099980	6453216	11476458		1539972	1833300		184107	217581	50211	133896
HP	60	50000000			1.5	0.5	0		683514	1101217	4974463	11467846		1518920	4556760	255150			595350	874125
HP	60	50000000			1.5	0.5	0	2528240	371800	966680	4573140	12566840		2044900	4015440	332640		201960	4590	27540
HP	60	50000000			1	0.5	0	3526096				16238600		1531068	2690968		111955		15539.4	33668.7
HP	60	50000000			1.5	0	0					12233884			982514				21422.5	47129.5

## Sheet: Sheet2
		Th17_GLN	Treg_GLN	Th1_GLN	eDC_GLN	tDC_GLN	Th1_LP	Th17_LP	Treg_LP	eDC_LP	tDC_LP	MO_LP	M1_LP	M2_LP
	CON 7	33962.5	100223
	CON 14	40796.7	321063	175628	37808.5	72424.8	794264	42962.9	884719	465913	160187	2.66924e+06	3.02321e+06	622874
	CON 30	27565.2	515431	16575.8	23539.4	50561.5	256774	263628	371009	403460	435851	4.65386e+06	2.37463e+06	204080
	CON 60	63250.8	55362.1	72818.4	17775.9	41649.9	446020	179719	174966	5.23096e+06			3.00577e+06	3.55392e+06
	INF 7	6567.5	1.26448e+06
	INF 14	81286.7	1.76049e+06	81286.7	59425.2	180337	575463	53000.5	438351	390736	221229	2.64742e+06	1.37588e+06	248774
	INF 30	32672	719649	17130.7	11454.9	36867.9	398866	260166	1382072	281906	1.14869e+06	5.899e+06	2.76668e+06	688731
	INF 60	194217	201381	307278	126687	208754	2678100	383907	1055959	4.88047e+06	1.27967e+07		1658715	2.35345e+06
