# Supplementary material for: Predictive Computational Modeling of the Mucosal Immune Responses during Helicobacter pylori Infection
Source: PLoS One. 2013 Sep 5;8(9):e73365. doi: 10.1371/journal.pone.0073365 (PMC3764126; doi:10.1371/journal.pone.0073365)
Supplement: Table S6 — Side-by-side comparison table of parameter values used in ENISI. Parameters were first adjusted using the ODE-based modeling parameters and they were manually adjusted. Parameters for wild-type (WT), T cell specific PPARγ knock-out (T-PPARγ) and myeloid cell-specific PPARγ knock-out (M-PPARγ) are shown. (XLSX) [file pone.0073365.s011.xlsx]

## Sheet: Sheet1
	Parameter	Parameter Description	Parameter value
			WT	PPARg-T	PPARg-M
	aT	Probability of resting T cell stimulation	0.5	1	0.5
	p17	Probability of resting T cell stimulation to Th17 vs. Th1 by eDC or M1	0.25	0.1	0.25
	anTreg	Probability of resting nTreg stimulation	0.5	0.5	0.5
	vT	fraction of active T cells that become memory T cells	0.5	0.5	0.5
	a1	co-efficient of M1 à M2 activators	1	1	0.1
	i1	co-efficient of M1 à M2 inhibitors	1	1	5
	y1	exponent of M1 à M2	2	2	2
	a2	co-efficient of M2 à M1 activators	1	1	5
	i2	co-efficient of M2 à M1 inhibitors	1	1	0.1
	y2	exponent of M2 à M1	2	2	2
	ar	co-efficient of iTreg à Th17 activators	1	5	1
	ir	co-efficient of iTreg à Th17 inhibitors	10	1	5
	yr	exponent of iTreg à Th17	2	1	2
	a17	co-efficient of Th17 à iTreg activators	10	1	10
	i17	co-efficient of Th17 à iTreg inhibitors	1	5	1
	y17	exponent of Th17 à iTreg	2	1	2
	vBM	probability that commensal bacteria induces inflammatory phenotype in macrophages	0.5	0.5	1
	vBD	probability that commensal bacteria induces inflammatory phenotype in dendritic cells	0.25	0.25	1
	vBs	probability that commensal bacteria induces inflammatory phenotype in ‘sampling’ dendritic cells	0.5	0.5	1
	vEC	Probability that EC transitions to pEcell upon contact within flammatory factors	0.25	0.25	0.25
	vEB	Probability that EC is damaged by microbial toxins	0.5	0.5	0.5
	br	Ability of commensal or inflammatory bacteria to induce chemoattractant expression in epithelial cells	0.25	0.25	0.25
	uCE	Probability that pEcell is killed by inflammatory factors	0.25	0.25	0.25
	bd	Relative amount of microbicide secreted by pECell, pEC noR in response to commensal or inflammatory bacteria	0.25	0.25	0.25
	uM1	Ability of M1 to eliminate bacteria	0.5	0.5	0.5
